# Supplementary material for: Enhanced cluster order–disorder transition-induced dilatancy in silane-functionalized nanosilica colloids
Source: Royal Society of Chemistry journal article supplement (doi:10.1039/c8sm02406e), 2019-01-01
Supplement: c8sm02406e1.pdf [file c8sm02406e1.pdf]

# Enhanced cluster order–disorder transition induced dilatancy in silane functionalized nanosilica colloids

Ajay Katiyar, Tandra Nandi, Priyanka Katiyar, Purbarun Dhar  
and N Eswara Prasad

## Supporting information

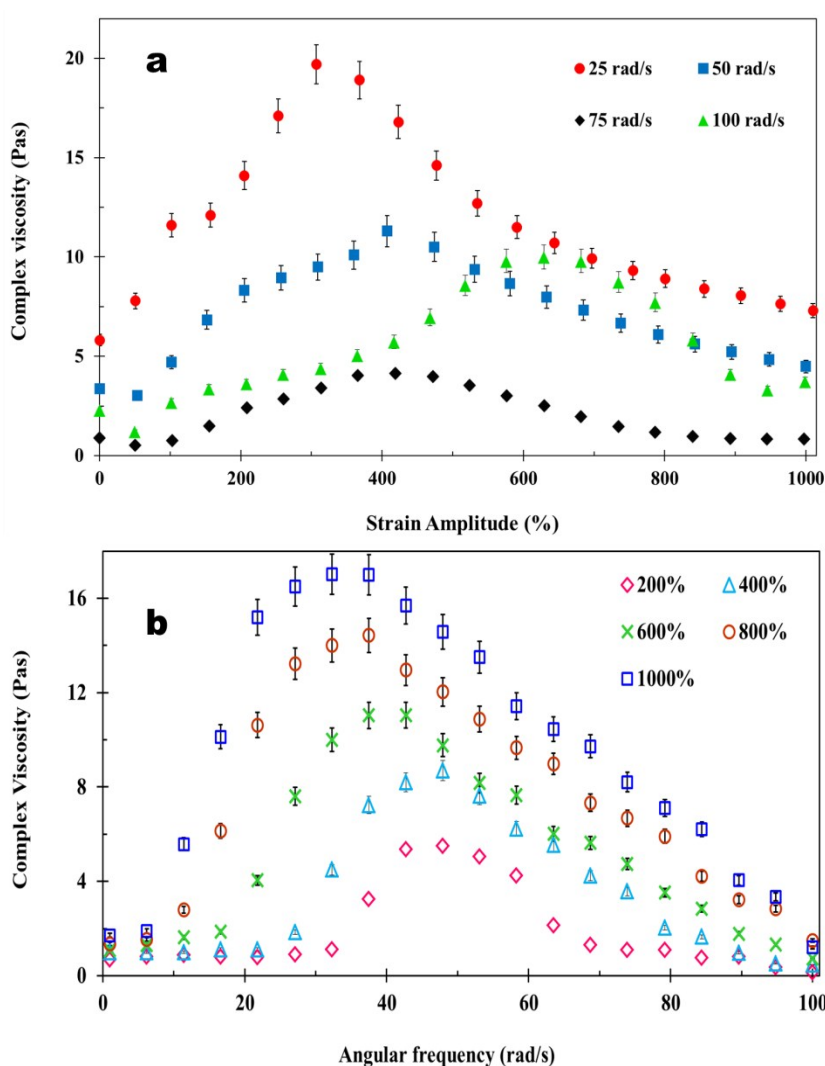

**Figure S1:** Complex viscosity variations as function of (a) oscillatory strain amplitude and (b) oscillatory frequency for n-Si based STF.

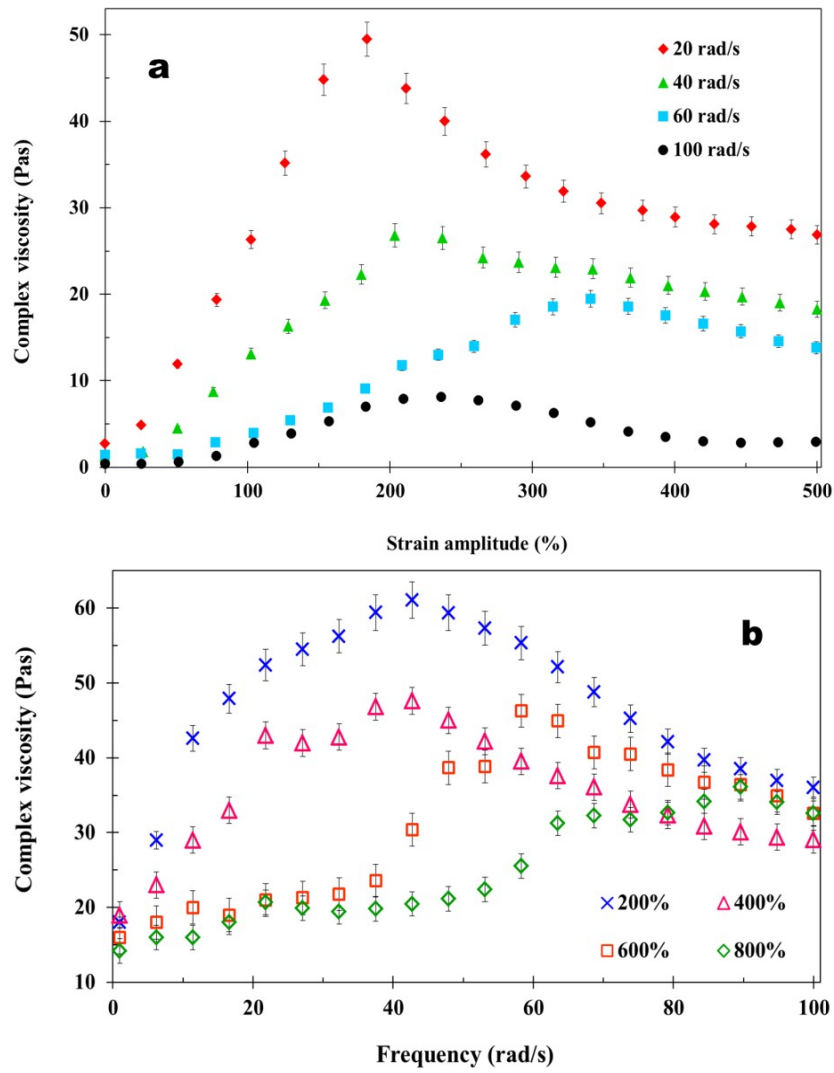

**Figure S2:** Complex viscosity variations as function of (a) oscillatory strain amplitude and (b) oscillatory frequency for s-f-n-Si based STFs.
